# Supplementary material for: Effects of NO3−, Cl−, and CH3COO− anions and diethylene glycol on the morphological, structural, antidiabetic, and cell viability properties of CeO2 nanoparticles
Source: Royal Society of Chemistry journal article supplement (doi:10.1039/d3ra02474a), 2023-01-01
Supplement: d3ra02474a1.pdf [file d3ra02474a1.pdf]

## Supplementary Information

### Effects of NO<sub>3</sub><sup>-</sup>, Cl<sup>-</sup>, and CH<sub>3</sub>COO<sup>-</sup> anions and diethylene glycol on the morphological, structural, antidiabetic, and cell viability properties of CeO<sub>2</sub> nanoparticles

Shaidatul Najihah Matussin<sup>1</sup>, Fazlurrahman Khan<sup>2,3</sup>, Pathum Chandika<sup>2,3</sup>, Mohammad Hilni Harunsani<sup>1</sup>, Norhayati Ahmad<sup>4</sup>, Young-Mog Kim<sup>2,3,5</sup>, Won-Kyo Jung<sup>2,3,6</sup>, and Mohammad Mansoob Khan<sup>1\*</sup>

<sup>1</sup>Chemical Sciences, Faculty of Science, Universiti Brunei Darussalam, Jalan Tungku Link, Gadong, BE 1410, Brunei Darussalam.

<sup>2</sup>Marine Integrated Biomedical Technology Center, The National Key Research Institutes in Universities, Pukyong National University, Busan, 48513, Republic of Korea.

<sup>3</sup>Research Center for Marine Integrated Bionics Technology, Pukyong National University, Busan, 48513, Republic of Korea.

<sup>4</sup>Environmental and Life Sciences, Faculty of Science, Universiti Brunei Darussalam, Jalan Tungku Link, Gadong, BE 1410, Brunei Darussalam.

<sup>5</sup>Department of Food Science and Technology, Pukyong National University, Busan 48513, Republic of Korea.

<sup>6</sup>Major of Biomedical Engineering, Division of Smart Healthcare and New-Senior Healthcare Innovation Center (BK21 Plus), Pukyong National University, Busan 48513, Republic of Korea

\*Email: [mmansoobkhan@yahoo.com](mailto:mmansoobkhan@yahoo.com) and [mansoob.khan@ubd.edu.bn](mailto:mansoob.khan@ubd.edu.bn)

**Table S1.** The amount of diethylene glycol and water used in the synthesis of CN, CC and CA samples.

| Samples       | Amount of diethylene glycol (mL) | Water (mL) |
|---------------|----------------------------------|------------|
| CN1/ CC1/ CA1 | 0.00                             | 25.00      |
| CN2/ CC2/ CA2 | 5.00                             | 20.00      |
| CN3/ CC3/ CA3 | 10.00                            | 15.00      |
| CN4/ CC4/ CA4 | 15.00                            | 10.00      |
| CN5/ CC5/ CA5 | 20.00                            | 5.00       |
| CN6/ CC6/ CA6 | 25.00                            | 0.00       |

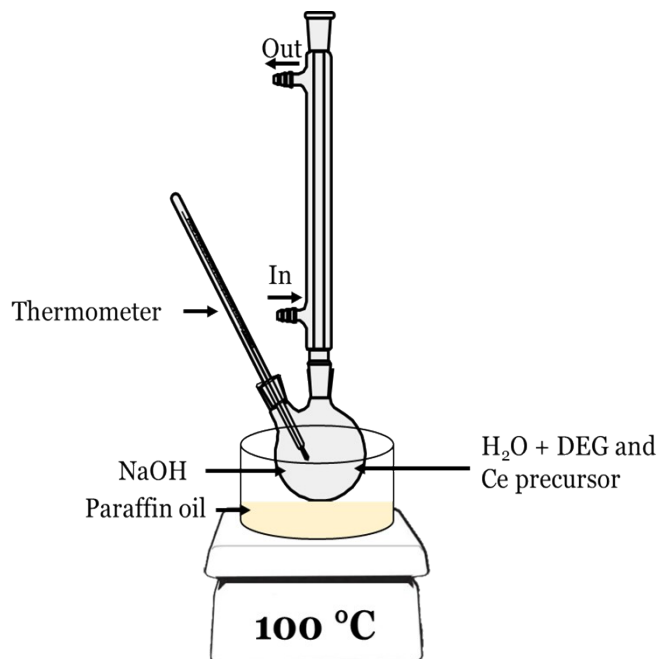

**Figure S1.** Schematic diagram of the synthesis procedure.

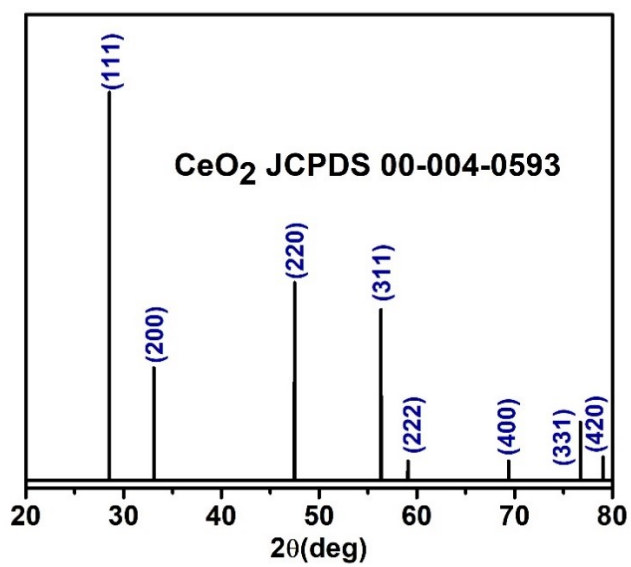

**Figure S2.** Standard XRD pattern of cubic CeO<sub>2</sub>.

**Table S2.** Summary of the inhibition of  $\alpha$ -glucosidase activity (%).

| Samples      | Inhibition of $\alpha$ -glucosidase activity (%) |            |            |            |            |             |            |            |            |
|--------------|--------------------------------------------------|------------|------------|------------|------------|-------------|------------|------------|------------|
|              | CN                                               |            |            | CC         |            |             | CA         |            |            |
|              | 0.5                                              | 1.5        | 2.5        | 0.5        | 1.5        | 2.5         | 0.5        | 1.5        | 2.5        |
| <b>C-Com</b> | 34.74±3.70                                       | 25.13±3.34 | 30.91±0.04 | 34.74±3.70 | 25.13±3.34 | 30.91±0.04  | 32.67±1.18 | 24.72±6.82 | 28.16±2.58 |
| <b>1</b>     | 40.86±2.34                                       | 42.29±0.93 | 42.15±1.69 | 36.78±4.96 | 40.31±1.04 | 33.87±2.98  | 9.40±6.32  | 3.02±2.45  | 2.34±0.34  |
| <b>2</b>     | 33.69±5.04                                       | 38.95±3.81 | 37.58±2.78 | 37.41±0.45 | 37.66±3.30 | 38.43±1.50  | 3.87±0.00  | 2.96±2.43  | 2.04±0.61  |
| <b>3</b>     | 30.42±12.73                                      | 39.03±3.99 | 40.15±2.77 | 43.33±1.11 | 36.78±9.23 | 41.57±1.54  | -          | 1.37±0.8   | 8.87±11.52 |
| <b>4</b>     | 43.15±2.05                                       | 41.12±0.90 | 33.69±5.65 | 30.92±7.24 | 29.79±1.92 | 37.77±3.14  | 2.93±2.3   | -          | 17.04±2.51 |
| <b>5</b>     | 36.08±2.10                                       | 33.69±5.65 | 36.99±1.89 | 42.83±3.63 | 28.92±6.85 | 34.48±1.75  | 0.56±0.08  | 0.30±2.38  | 17.12±1.66 |
| <b>6</b>     | 41.70±2.91                                       | 40.92±2.19 | 41.07±1.69 | 39.38±2.97 | 44.35±7.60 | 38.56±10.05 | 5.59±1.07  | 2.42±2.52  | 2.04±0.61  |
